# Supplementary material
Source: PubMed Central journal article supplement (PMC2932579)
Supplement: 1004809107_pnas.1004809107_SI.pdf [file 1004809107_pnas.1004809107_SI.pdf]

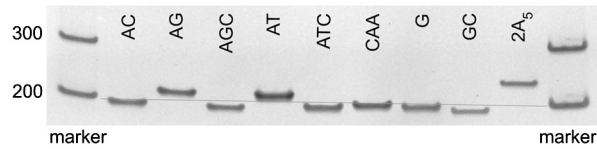

**Fig. S1.** The test of possible intrinsic curvature for the fragments of elemental set 1 by measuring their mobility in polyacrylamide gel (6–8). The major sequence motifs of the fragments are shown at the top of the gel. Mobility of the fragments in the 4–12% gradient polyacrylamide gel should be compared with the mobility of the marker and 200-bp fragment with two AAAAA ( $2A_5$ ) tracts in the middle of the fragment, separated by 5 bp. The total intrinsic bend in the latter fragment is close to  $30^\circ$  (7, 9, 10). For all fragments of the set, the mobility variations are much smaller than the mobility reduction for the fragment containing A tracts, showing that the fragments do not have essential intrinsic curvature.

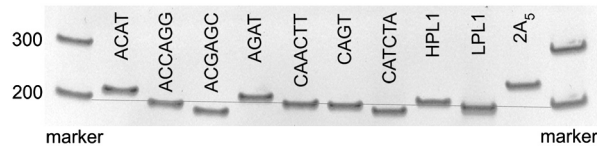

**Fig. S2.** The test of possible intrinsic curvature for the fragments of elemental set 2. For all fragments of the set the mobility variations are much smaller than the mobility reduction for the fragment containing A tracts, showing that the fragments of this set do not have essential intrinsic curvature.

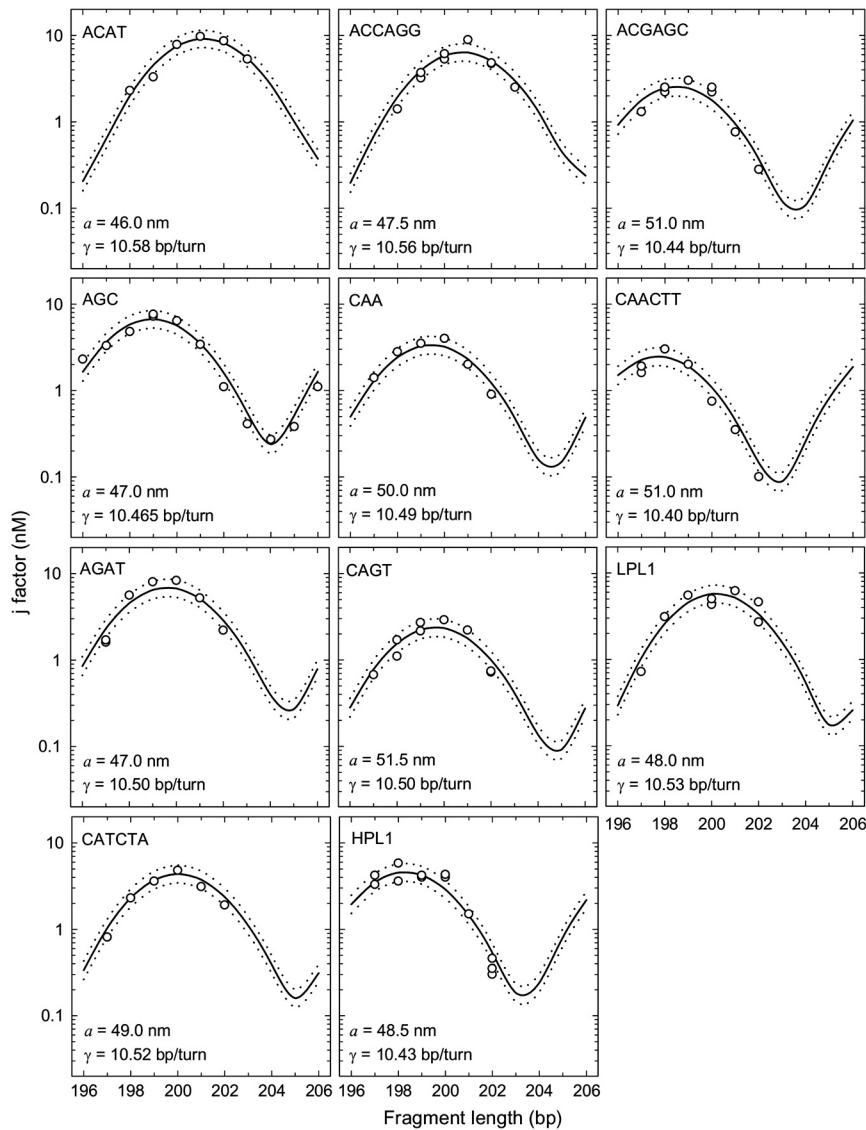

**Fig. S3.** The measured values of  $j$  factors for 11 fragments of elemental set 2 and their theoretical fit. The values of  $a$  and  $\gamma$  corresponding to the best fit are shown inside each plot. The theoretical curves corresponding to the best fit are shown by the solid lines; the dotted lines correspond to values of  $a$  differed from the best fit by  $\pm 1$  nm. The value of  $C$  used in the fitting procedure equals  $2.6 \times 10^{-19}$  erg  $\cdot$  cm for all fragments. This value of  $C$  is the average over a few fragments used in the current study.
